# Supplementary material
Source: PubMed Central journal article supplement (PMC6344935)
Supplement: NIHMS1003453-supplement-Supplemental_Information.pdf [file NIHMS1003453-supplement-Supplemental_Information.pdf]

## Supporting Information for Publication

### Title of Paper

Quantitative analysis of SHBG glycosylation in liver diseases by LC/MS-PRM

### Authors

Wei Yuan<sup>1</sup>, Julius Benicky<sup>1</sup>, Renhuizi Wei<sup>1</sup>, Radoslav Goldman<sup>1,2</sup>, Miloslav Sanda<sup>1\*</sup>

### Affiliations

1. Department of Oncology, Lombardi Comprehensive Cancer Center, Georgetown University, Washington, DC, 20057, USA;

2. Department of Biochemistry and Molecular & Cellular Biology, Georgetown University, Washington, DC, 20057, USA.

### Corresponding Author

\*Miloslav Sanda, Department of Oncology, Lombardi Comprehensive Cancer Center, Georgetown University, Washington, DC, 20057, USA

Email: [ms2465@georgetown.edu](mailto:ms2465@georgetown.edu)

Phone: +1 202-6879868

### Table of Contents

**Table S1:** MELD scores of patients with different liver diseases.

**Table S2:** Parameters for the quantification of all the known SHBG glycopeptides.

**Table S3:** Reproducibility of the measurements.

**Table S4:** Glycosylation changes among healthy, cirrhosis, and HCC patients.

**Table S5:** Glycosylation changes in cirrhosis patients with different etiology.

**Table S6:** Changes in the outer arm fucosylation, HexNAc(4)Hex(6) N-glycoform, and O-glycan sialylation in cirrhotic patients with different etiologies and HCC.

**Figure S1:** Comparison of the data normalization methods.

**Figure S2:** Serum SHBG in liver diseases measured by ELISA.

**Figure S3:** Cleavage of outer arm fucose on fucosylated glycoforms of SHEIWITHSCPQSPGNGTDASH.

**Table S1: MELD scores of patients with different liver diseases. N/A: not available.**

|               |   | <b>HCC</b> | <b>HCV</b> | <b>HBV</b> | <b>ALD</b> | <b>NASH</b> |
|---------------|---|------------|------------|------------|------------|-------------|
| <b>pool 1</b> | 1 | 18         | 14         | 24         | 14         | 22          |
|               | 2 | 15         | 11         | 16         | 14         | 11          |
|               | 3 | 13         | 19         | N/A        | 18         | 14          |
|               | 4 | 12         | 23         | 14         | 18         | 11          |
|               | 5 | 17         | 7          | 6          | 14         | 15          |
| <b>pool 2</b> | 1 | 13         | 9          | 21         | 12         | 7           |
|               | 2 | 17         | 10         | 12         | 13         | N/A         |
|               | 3 | 19         | 18         | N/A        | 11         | 15          |
|               | 4 | 14         | 19         | 11         | 18         | 8           |
|               | 5 | 12         | 16         | N/A        | 17         | 32          |

**Table S2. Parameters for the quantification of all the known SHBG glycopeptides.**

| Glycoforms         | Peptide mass (Da)  | Retention Time (min)                       | CE(eV) | Fragments used for quantification |            |                                         |            |
|--------------------|--------------------|--------------------------------------------|--------|-----------------------------------|------------|-----------------------------------------|------------|
|                    | LDVDQALNR          | analyzed in trypsin digest                 |        |                                   |            |                                         |            |
| A2G2               | 889.4(3+)          | 15.03                                      | 23     | 1070.0(2+)                        | 1151.0(2+) |                                         |            |
| A2G2S              | 986.4(3+)          | 15.78                                      | 24     | 1151.0(2+)                        | 1296.6(2+) | 1333.6(2+)                              |            |
| A2G2SF             | 1035.1(3+)         | 15.68                                      | 26     | 1224.0(2+)                        | 1406.6(2+) |                                         |            |
| A2G2S2             | 1083.4(3+)         | 17.06                                      | 25     | 1215.5(2+)                        | 1296.6(2+) | 1479.1(2+)                              |            |
| A2G2S2F            | 1132.1(3+)         | 17.06                                      | 26     | 1288.6(2+)                        | 1369.6(2+) | 1552.1(2+)                              |            |
| A3G3S2             | 904.1(4+)          | 16.90                                      | 18     | 1108.1(3+)                        | 1296.6(2+) | 1479.1(2+)                              |            |
| A3G3S2F            | 940.6(4+)          | 16.84                                      | 18     | 1296.6(2+)                        | 1479.1(2+) | 1624.7(2+)                              |            |
| A3G3S3             | 976.9(4+)          | 18.81                                      | 19     | 1205.2(3+)                        | 1479.1(2+) | 1624.7(2+)                              |            |
| A3G3S3F            | 1013.4(4+)         | 18.68                                      | 19     | 1479.1(2+)                        | 1552.1(2+) | 1624.7(2+)                              |            |
| Unoccupied form    | 522.3(2+)          | 15.82                                      | 40     | 473.3(1+)                         | 601.3(1+)  | 716.4(1+)                               | 815.4(1+)  |
|                    |                    | analyzed in trypsin/Neuraminidase A digest |        |                                   |            |                                         |            |
| A2G2               | 889.4(3+)          | 15.05                                      | 23     | 1070.0(2+)                        | 1151.0(2+) |                                         |            |
| A2G2F              | 938.1(3+)          | 14.99                                      | 24     | 1143.0(2+)                        | 1151.0(2+) | 1224.0(2+)                              |            |
| A3G3               | 1011.1(3+)         | 14.91                                      | 25     | 1070.0(2+)                        | 1252.5(2+) | 1333.6(2+)                              |            |
| A3G3F              | 1059.8(3+)         | 14.82                                      | 25     | 1333.6(2+)                        | 1406.6(2+) |                                         |            |
| HexNAc(4)Hex(6)    | 943.4(3+)          | 14.98                                      | 24     | 1151.0(2+)                        | 1232.0(2+) |                                         |            |
|                    | SHEIWTWSCPQSPGNGT  | analyzed in trypsin digest                 |        |                                   |            |                                         |            |
|                    | DASH               |                                            |        |                                   |            |                                         |            |
| A2G2               | 982.6(4+)          | 12.51                                      | 23     | 1188.1(3+)                        | 1134.1(3+) |                                         |            |
| A2G2S              | 1055.4(4+)         | 12.79                                      | 27     | 1188.1(3+)                        | 1285.2(3+) | 1309.9(3+)                              |            |
| A2G2SF             | 1091.9(4+)         | 12.78                                      | 27     | 1236.8((3+)                       | 1333.9(3+) | 1358.5(3+)                              |            |
| A2G2S2             | 1128.2(4+)         | 13.13                                      | 29     | 1188.1(3+)                        | 1231.2(3+) | 1285.2(3+)                              | 1406.9(3+) |
| A2G2S2F            | 1164.7(4+)         | 13.11                                      | 28     | 1236.8((3+)                       | 1279.9(3+) | 1333.9(3+)                              | 1455.6(3+) |
| A3G3S2             | 975.8(5+)          | 13.07                                      | 19     | 1055.4(4+)                        | 1128.2(4+) | 1188.1(3+)                              | 1285.2(3+) |
| A3G3S2F            | 1005.0(5+)         | 13.03                                      | 20     | 1055.4(4+)                        | 1091.9(4+) | 1164.7(4+)                              |            |
| A3G3S3             | 1034.0(5+)         | 13.29                                      | 20     | 1128.2(4+)                        | 1219.5(4+) |                                         |            |
| A3G3S3F            | 1063.2(5+)         | 13.22                                      | 21     | 1128.2(4+)                        | 1164.7(4+) | 1256.0(4+)                              |            |
| Unoccupied form    | 577.2(4+)          | 13.2                                       | 35     | 587.2(1+)                         | 856.3(1+)  |                                         |            |
|                    |                    | analyzed in trypsin/Neuraminidase A digest |        |                                   |            |                                         |            |
| A2G2               | 982.6(4+)          | 11.73                                      | 23     | 1188.1(3+)                        | 1134.1(3+) |                                         |            |
| A2G2F              | 1019.2(4+)         | 11.71                                      | 25     | 1182.8(3+)                        | 1188.1(3+) | 1236.8(3+)                              |            |
| A3G3               | 1073.9(4+)         | 11.64                                      | 26     | 1134.1(3+)                        | 1309.9(3+) |                                         |            |
| A3G3F              | 1110.4(4+)         | 11.6                                       | 28     | 1134.1(3+)                        | 1309.9(3+) | 1358.5(3+)                              |            |
| HexNAc(4)Hex(6)    | 1023.2(4+)         | 11.69                                      | 25     | 1188.1(3+)                        | 1242.2(3+) |                                         |            |
|                    | LRPVLPTQSAHDPPAVHL |                                            |        |                                   |            |                                         |            |
|                    | SNGPGQEPIAVMTFDLTK |                                            |        |                                   |            |                                         |            |
| HexNAc-Hex         | 840.63(5+)         | 24.17/24.57                                | 40     | 724.4(1+)                         | 855.4(1+)  | 1025.5(1+)                              |            |
| HexNAc-Hex-Neu5AC  | 898.85(5+)         | 24.87/25.30                                | 40     | 724.4(1+)                         | 855.4(1+)  | 1025.5(1+)                              |            |
| HexNAc-Hex-2Neu5AC | 957.07(5+)         | 25.60/25.90                                | 40     | 724.4(1+)                         | 1025.5(1+) | 1085.9(original)/1086.2(deaminated)(3+) |            |
|                    | Unique peptide     |                                            |        |                                   |            |                                         |            |
| IALGGLLPASNLR      | 721.4(2+)          | 27.52                                      | 35     | 657.4(1+)                         | 804.4(1+)  | 917.5(1+)                               |            |

**Table S3. Reproducibility of the measurements.** Reproducibility is expressed as RSD (%) of the intra- (n=4) and inter- (n=9) sample variability of quantification.

| Peaks were normalized to the sum of all forms of LDVDQALNR | Intra sample reproducibility ( n=4)<br>RSD(%) | Inter sample reproducibility ( n=9)<br>RSD(%) |
|------------------------------------------------------------|-----------------------------------------------|-----------------------------------------------|
| A2G2S                                                      | 3.7                                           | 10.9                                          |
| A2G2SF                                                     | 1.9                                           | 17.9                                          |
| A2G2S2                                                     | 0.6                                           | 1.0                                           |
| A2G2S2F                                                    | 7.1                                           | 9.2                                           |
| A3G3S3                                                     | 33.7                                          | 14.0                                          |
| A3G3S2F                                                    | 12.7                                          | 16.0                                          |
| A3G3S2F                                                    | 11.0                                          | 14.8                                          |
| A3G3S3F                                                    | 34.7                                          | ND                                            |
| LDVDQALNR(non-occupied)                                    | 4.4                                           | 15.3                                          |
| average                                                    | 12.2                                          | 12.4                                          |

**Table S4. Glycosylation changes among healthy, cirrhosis, and HCC patients.** H: healthy controls; CIR: cirrhotic patients; HCC: hepatocellular carcinoma patients. Total fucosylation (%) represents the percentage of fucosylated species in all detected glycoforms quantified by the LC/MS PRM method. Branching represents the ratio of the sum of triantennary glycoforms to the sum of the biantennary glycoforms. Data is shown as mean  $\pm$  standard deviation from duplicated analyses of 2 pooled samples each group. Number in Bold: significantly different from healthy control by one way Anova with Bonferroni procedure at  $p < 0.05$ ; \*: significantly different from CIR group by one way Anova with Bonferroni procedure at  $p < 0.05$ .

|                                             | H                 | CIR                                 | HCC                                 | ANOVA (p) |
|---------------------------------------------|-------------------|-------------------------------------|-------------------------------------|-----------|
| <b>LDVDQALNR</b>                            |                   |                                     |                                     |           |
| A2G2S2F/A2G2S2                              | 0.014 $\pm$ 0.001 | <b>0.023 <math>\pm</math> 0.004</b> | <b>0.024 <math>\pm</math> 0.003</b> | <0.001    |
| A2G2SF/A2G2S                                | 0.202 $\pm$ 0.05  | <b>1.356 <math>\pm</math> 0.6</b>   | 1.303 $\pm$ 0.7                     | 0.008     |
| A3G3S3F/A3G3S3                              | 0.164 $\pm$ 0.05  | <b>0.284 <math>\pm</math> 0.07</b>  | <b>0.317 <math>\pm</math> 0.02</b>  | 0.003     |
| Total fucosylation (%)                      | 1.853 $\pm$ 0.2   | <b>3.266 <math>\pm</math> 0.4</b>   | <b>3.609 <math>\pm</math> 0.5</b>   | <0.001    |
| (A2G2S2F+A2G2S2)/<br>(A2G2S+A2G2SF)         | 95.209 $\pm$ 10   | 107.891 $\pm$ 40                    | 79.210 $\pm$ 40                     | 0.370     |
| A2G2S2/A2G2S                                | 112.533 $\pm$ 10  | 259.527 $\pm$ 100                   | 197.482 $\pm$ 100                   | 0.129     |
| A2G2S2F/A2G2SF                              | 8.083 $\pm$ 2     | <b>4.411 <math>\pm</math> 1</b>     | <b>3.175 <math>\pm</math> 0.6</b>   | <0.001    |
| (A3G3S3+A3G3S3F)/<br>(A3G3S2+A3G3S2F)       | 9.290 $\pm$ 2     | 17.514 $\pm$ 8                      | 12.800 $\pm$ 7                      | 0.136     |
| A3G3S3/A3G3S2                               | 8.052 $\pm$ 2     | 13.558 $\pm$ 6                      | 9.752 $\pm$ 6                       | 0.176     |
| Branching                                   | 3.741 $\pm$ 1     | 3.867 $\pm$ 1                       | 4.253 $\pm$ 0.9                     | 0.823     |
| <b>SHEIWTWSCPQSPGNGTDASH</b>                |                   |                                     |                                     |           |
| A2G2S2F/A2G2S2                              | 0.082 $\pm$ 0.01  | <b>0.182 <math>\pm</math> 0.04</b>  | <b>0.190 <math>\pm</math> 0.03</b>  | <0.001    |
| A2G2SF/A2G2S                                | 0.239 $\pm$ 0.06  | <b>0.680 <math>\pm</math> 0.2</b>   | <b>0.795 <math>\pm</math> 0.3</b>   | 0.002     |
| A3G3S3F/A3G3S3                              | 0.480 $\pm$ 0.09  | <b>1.031 <math>\pm</math> 0.3</b>   | <b>1.168 <math>\pm</math> 0.09</b>  | <0.001    |
| A3G3S2F/A3G3S2                              | 0.405 $\pm$ 0.08  | <b>1.422 <math>\pm</math> 0.3</b>   | <b>1.818 <math>\pm</math> 0.2</b>   | <0.001    |
| Total fucosylation (%)                      | 9.908 $\pm$ 0.5   | <b>19.593 <math>\pm</math> 3</b>    | <b>20.690 <math>\pm</math> 3</b>    | <0.001    |
| (A2G2S2F+A2G2S2)/<br>(A2G2S+A2G2SF)         | 210.136 $\pm$ 40  | 290.983 $\pm$ 200                   | 415.794 $\pm$ 400                   | 0.494     |
| A2G2S2/A2G2S                                | 239.018 $\pm$ 40  | 407.149 $\pm$ 300                   | 695.229 $\pm$ 700                   | 0.240     |
| A2G2S2F/A2G2SF                              | 90.652 $\pm$ 40   | 118.829 $\pm$ 100                   | 132.020 $\pm$ 100                   | 0.832     |
| (A3G3S3+A3G3S3F)/<br>(A3G3S2+A3G3S2F)       | 42.895 $\pm$ 2    | <b>22.591 <math>\pm</math> 6</b>    | <b>16.425 <math>\pm</math> 0.9</b>  | <0.001    |
| A3G3S3/A3G3S2                               | 40.960 $\pm$ 5    | <b>26.745 <math>\pm</math> 7</b>    | <b>21.378 <math>\pm</math> 2</b>    | <0.001    |
| A3G3S3F/A3G3S2F                             | 48.784 $\pm$ 8    | <b>19.726 <math>\pm</math> 6</b>    | <b>13.759 <math>\pm</math> 1</b>    | <0.001    |
| Branching                                   | 10.498 $\pm$ 0.7  | 14.281 $\pm$ 5                      | 14.042 $\pm$ 4                      | 0.370     |
| <b>LRPVLPTQSAHDPPAVHLSNGPGQEPIAVMTFDLTK</b> |                   |                                     |                                     |           |
| HexNAc-Hex-2Neu5Ac/<br>HexNAc-Hex-Neu5Ac    | 0.139 $\pm$ 0.03  | <b>0.256 <math>\pm</math> 0.07</b>  | <b>0.509 <math>\pm</math> 0.07*</b> | <0.001    |

**Table S5. Glycosylation changes in cirrhosis patients with different etiology.** H: healthy control; ALD: alcoholic; NASH: non-alcoholic steatohepatitis; HBV: hepatitis B; HCV: hepatitis C. Total fucosylation (%) represents the percentage of fucosylated species in all detected glycoforms quantified by the LC/MS PRM method. Data is shown as mean  $\pm$  standard deviation from duplicated analyses of 2 pooled samples each group. Number in Bold: significantly different from healthy controls by one way Anova with Bonferroni procedure at  $p < 0.05$ .

|                                       | H                 | ALD                                 | NASH                                | HBV                                 | HCV                                | ANOVA (p) |
|---------------------------------------|-------------------|-------------------------------------|-------------------------------------|-------------------------------------|------------------------------------|-----------|
| <b>LDVDQALNR</b>                      |                   |                                     |                                     |                                     |                                    |           |
| A2G2S2F/<br>A2G2S2                    | 0.014 $\pm$ 0.001 | <b>0.024 <math>\pm</math> 0.005</b> | <b>0.025 <math>\pm</math> 0.002</b> | <b>0.022 <math>\pm</math> 0.002</b> | 0.020 $\pm$ 0.004                  | <0.001    |
| A2G2SF/<br>A2G2S                      | 0.202 $\pm$ 0.05  | 0.973 $\pm$ 0.6                     | <b>1.559 <math>\pm</math> 0.5</b>   | 0.991 $\pm$ 0.3                     | <b>1.899 <math>\pm</math> 0.8</b>  | 0.003     |
| A3G3S3F/<br>A3G3S3                    | 0.164 $\pm$ 0.05  | 0.241 $\pm$ 0.08                    | <b>0.346 <math>\pm</math> 0.03</b>  | 0.293 $\pm$ 0.08                    | 0.254 $\pm$ 0.03                   | 0.007     |
| Total fucosylation<br>(%)             | 1.853 $\pm$ 0.2   | <b>3.190 <math>\pm</math> 0.4</b>   | <b>3.799 <math>\pm</math> 0.2</b>   | <b>3.108 <math>\pm</math> 0.2</b>   | <b>2.967 <math>\pm</math> 0.4</b>  | <0.001    |
| A2G2S2F/<br>A2G2SF                    | 8.083 $\pm$ 2     | 5.181 $\pm$ 1                       | <b>4.087 <math>\pm</math> 2</b>     | <b>3.864 <math>\pm</math> 2</b>     | 4.510 $\pm$ 0.6                    | 0.011     |
| <b>SHEIWITHSCPQSPGNGTDASH</b>         |                   |                                     |                                     |                                     |                                    |           |
| A2G2S2F/<br>A2G2S2                    | 0.082 $\pm$ 0.01  | <b>0.225 <math>\pm</math> 0.03</b>  | <b>0.186 <math>\pm</math> 0.02</b>  | <b>0.146 <math>\pm</math> 0.01</b>  | <b>0.169 <math>\pm</math> 0.05</b> | <0.001    |
| A2G2SF/<br>A2G2S                      | 0.239 $\pm$ 0.06  | <b>0.664 <math>\pm</math> 0.1</b>   | <b>0.648 <math>\pm</math> 0.1</b>   | 0.545 $\pm$ 0.03                    | <b>0.862 <math>\pm</math> 0.3</b>  | 0.001     |
| A3G3S3F/<br>A3G3S3                    | 0.480 $\pm$ 0.09  | <b>1.018 <math>\pm</math> 0.4</b>   | <b>1.235 <math>\pm</math> 0.2</b>   | 0.979 $\pm$ 0.2                     | 0.891 $\pm$ 0.08                   | 0.003     |
| A3G3S2F/<br>A3G3S2                    | 0.405 $\pm$ 0.08  | <b>1.207 <math>\pm</math> 0.5</b>   | <b>1.461 <math>\pm</math> 0.2</b>   | <b>1.328 <math>\pm</math> 0.1</b>   | <b>1.693 <math>\pm</math> 0.3</b>  | <0.001    |
| Total fucosylation<br>(%)             | 9.908 $\pm$ 0.5   | <b>22.116 <math>\pm</math> 2</b>    | <b>21.743 <math>\pm</math> 0.7</b>  | <b>15.723 <math>\pm</math> 1</b>    | <b>18.789 <math>\pm</math> 3</b>   | <0.001    |
| A3G3S3/<br>A3G3S2                     | 40.960 $\pm$ 5    | <b>24.851 <math>\pm</math> 4</b>    | 32.050 $\pm$ 6                      | <b>20.126 <math>\pm</math> 2</b>    | 29.953 $\pm$ 7                     | <0.001    |
| A3G3S3F/<br>A3G3S2F                   | 48.784 $\pm$ 8    | <b>20.603 <math>\pm</math> 2</b>    | <b>27.140 <math>\pm</math> 6</b>    | <b>15.172 <math>\pm</math> 5</b>    | <b>15.990 <math>\pm</math> 4</b>   | <0.001    |
| (A3G3S3+A3G3S3F)/<br>(A3G3S2+A3G3S2F) | 42.895 $\pm$ 2    | <b>22.693 <math>\pm</math> 3</b>    | <b>29.149 <math>\pm</math> 6</b>    | <b>17.267 <math>\pm</math> 3</b>    | <b>21.253 <math>\pm</math> 5</b>   | <0.001    |





**Figure S1. Comparison of the data normalization methods.** The results represent an average of four injections.

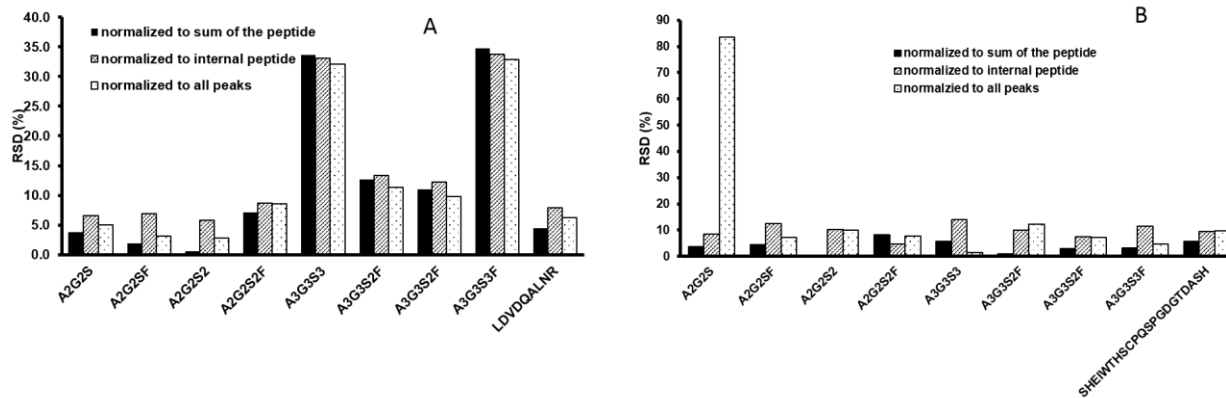

**Figure S2. Serum SHBG in liver diseases measured by ELISA.** H: healthy control; CIR: cirrhotic patients; HCC: hepatocellular carcinoma patients. \*: significantly different from healthy control by one way Anova with Bonferroni procedure at  $p < 0.05$ .

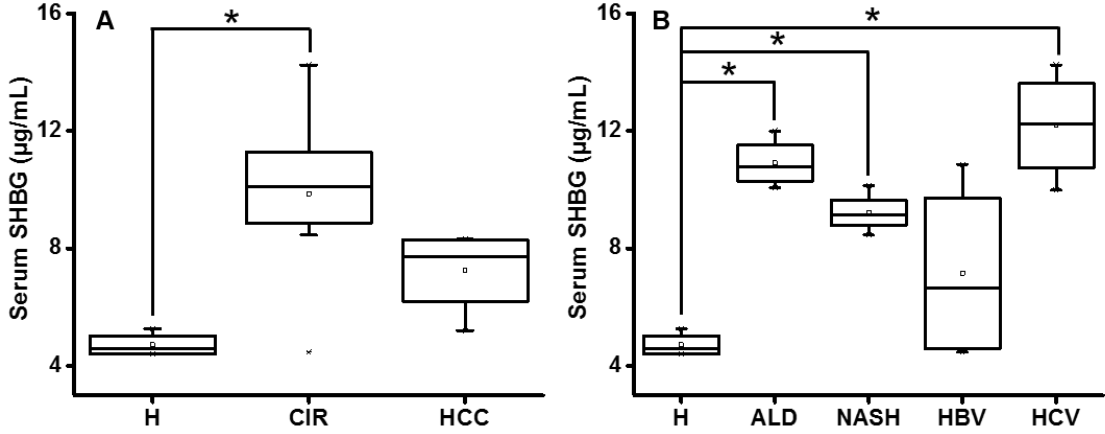

**Figure S3. Cleavage of outer arm fucose on fucosylated glycoforms of SHEIWTHTSCPQSPGNGTDASH.** Completed removal of outer arm fucose on fucosylated triantennary glycoform of SHEIWTHTSCPQSPGNGTDASH (A-C); incomplete digestion of outer arm fucose on fucosylated biantennary glycoform of SHEIWTHTSCPQSPGNGTDASH (D-E). MSMS spectrum of the fucosylated triantennary (A) and biantennary (D) glycoforms; XIC of the following analytes treated with Neuraminidase A alone (Blue) or Neuraminidase A followed by  $\alpha$ 1-3,4 and  $\alpha$ 1,-2 Fucosidases (Pink): (B) non-fucosylated fragment m/z 1309.8 (3+) and (C) oxonium ion m/z 512.2 (1+) specific for outer arm fucose of the fucosylated triantennary glycoform; (E) non-fucosylated fragment m/z 1188.1 (3+) and (F) oxonium ion m/z 512.2 (1+) of the fucosylated biantennary glycoform. square: GlcNAc, green circle: Man, yellow circle: Gal; red triangle: Fuc.

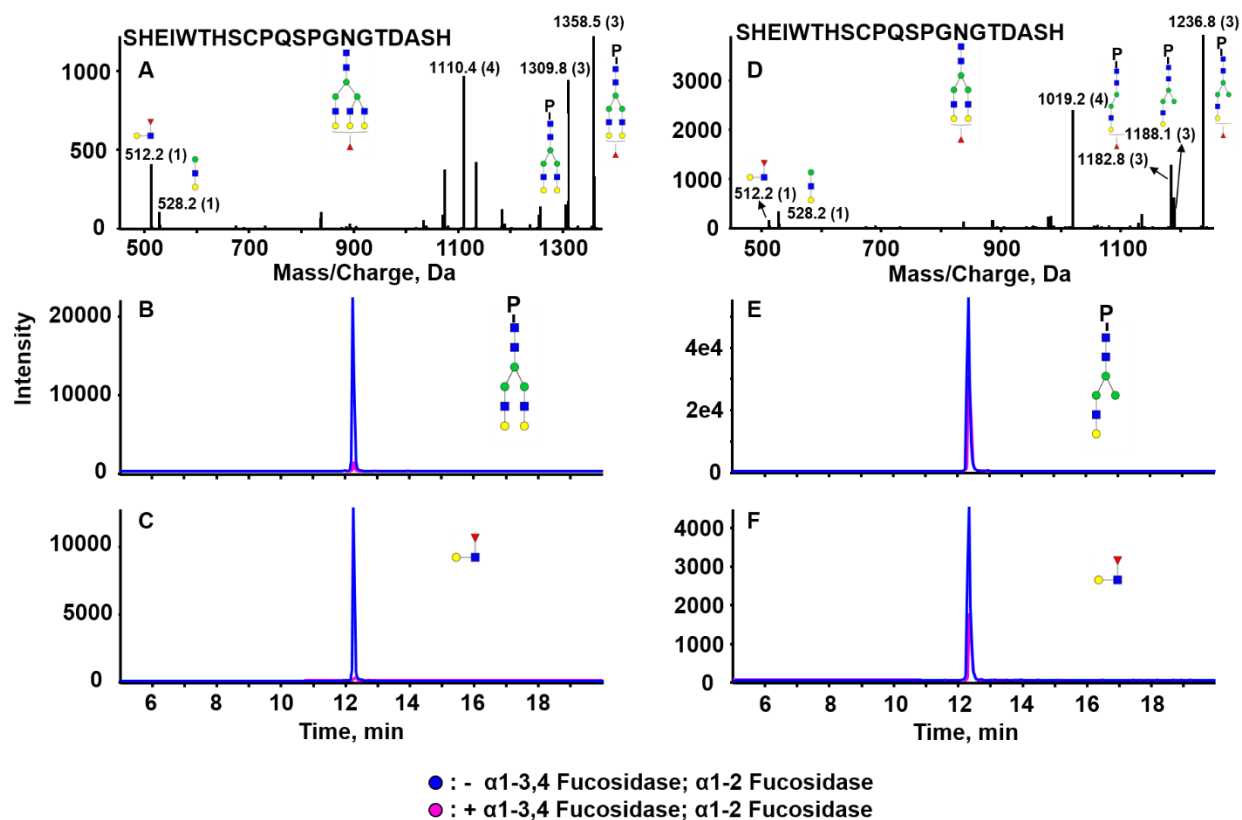

### **Identification of SHBG glycoforms by Orbitrap Fusion Lumos**

Digested protein was separated using a 90 minute ACN gradient on a 150 mm x 75  $\mu\text{m}$  C18 pepmap column at a flow rate of 0.3  $\mu\text{L}/\text{min}$ . In brief, peptide and glycopeptide separation was achieved by a 5 min trapping/washing step using 99% solvent A (2% acetonitrile containing 0.1% formic acid) at 10  $\mu\text{L}/\text{min}$  followed by a 90 min acetonitrile gradient at a flow rate of 0.3  $\mu\text{L}/\text{min}$ : 0-3min 2% B, 3-5min from 2% to 10% solvent B (0.1% formic acid in acetonitrile); 5-60 min from 10% to 45% solvent B; 60-65 from 35% to 98% solvent B; 65-70min at 98% solvent B, 70.1-90min equilibration by 2% solvent B.

Glycopeptides were analyzed using an Orbitrap Lumos Fusion mass spectrometer. The electrospray ionization voltage was set to 2.3 kV, and the capillary temperature was set to 275  $^{\circ}\text{C}$ . MS1 scans were performed over  $m/z$  400–1800 with the wide quadrupole isolation on at a resolution of 120, 000 ( $m/z$  200), RF Lens was set to 40%, intensity threshold for MS2 was set to  $2.0 \times 10^4$ , selected precursors for MS2 were with charge state 2-7, Dynamic exclusion was set for 30s. Data-dependent HCD tandem mass spectra were collected with a resolution of 15, 000 in the Orbitrap with fixed first mass 110 and normalized collision energy 25%. The identification of glycopeptides was performed manually.
